# Supplementary material for: Polyvinylidene Fluoride Aerogels with Tailorable Crystalline Phase Composition
Source: MDPI journal article supplement (doi:10.3390/gels8110727), 2022-11-09
Supplement: s1 [file s1]

Article

# Polyvinylidene Fluoride Aerogels with Tailorable Crystalline Phase Composition

Jorge Torres Rodriguez <sup>1,2</sup>, Diana E. Bedolla <sup>3,4</sup>, F. D'Amico<sup>3</sup>, Ann-Kathrin Koopmann<sup>1,2</sup>, Lisa Vaccari <sup>3,4</sup>, Giulia Saccomano<sup>3,5</sup>, Richard Kohns<sup>1,2</sup>, and Nicola Huesing <sup>1,2,\*</sup>

<sup>1</sup> Paris-Lodron University of Salzburg, Department of Chemistry and Physics of Materials, Jakob Haringer-Str. 2A, 5020 Salzburg, Austria

<sup>2</sup> Salzburg Center for Smart Materials, Jakob Haringer-Str. 2A, 5020 Salzburg, Austria

<sup>3</sup> Elettra-Sincrotrone Trieste, SS14 Km 163.5, 34149 Trieste, Italy

<sup>4</sup> Area Science Park, Padriciano 99, 34149 Trieste Italy

<sup>5</sup> Department of Engineering and Architecture, University of Trieste, Via Alfonso Valerio 6/1, 34127 Trieste, Italy

\* Correspondence: nicola.huesing@plus.ac.at

**Table S1.** Detailed description of the prepared samples and their compositions

| Sample       | PVDF<br>(wt. %.) | PVDF/H <sub>2</sub> O | $x_{DMF}$ | $x_{EtOH}$ | $t_{gel}$<br>(min) |
|--------------|------------------|-----------------------|-----------|------------|--------------------|
| P12          | 12               | 0                     | 1         | 0          | 30                 |
| P9           | 9                |                       |           |            | 45                 |
| P7           | 7                |                       |           |            | -                  |
| P5           | 5                |                       |           |            | -                  |
| P3           | 3                |                       |           |            | -                  |
| P12E0.2      | 12               | 0                     | 0.8       | 0.2        | 21                 |
| P9E0.2       | 9                |                       |           |            | 23                 |
| P7E0.2       | 7                |                       |           |            | 27                 |
| P5E0.2       | 5                |                       |           |            | 45                 |
| P12E0.4      | 12               | 0                     | 0.6       | 0.4        | 15                 |
| P9E0.4       | 9                |                       |           |            | 18                 |
| P7E0.4       | 7                |                       |           |            | 25                 |
| P5E0.4       | 5                |                       |           |            | 45                 |
| P12E0.5      | 12               | 0                     | 0.5       | 0.5        | 10                 |
| P9E0.5       | 9                |                       |           |            | 12                 |
| P7E0.5       | 7                |                       |           |            | 15                 |
| P5E0.5       | 5                |                       |           |            | 16                 |
| P12E0.2H0.75 | 12               | 0.75                  | 0.8       | 0.2        | 3                  |
| P12E0.2H0.80 |                  | 0.80                  |           |            | 5                  |
| P12E0.2H0.86 |                  | 0.86                  |           |            | 8                  |
| P12E0.2H0.92 |                  | 0.92                  |           |            | 10                 |
| P12E0.2H1.0  |                  | 1.0                   |           |            | 10                 |
| P12E0.2H1.5  |                  | 1.5                   |           |            | 11                 |
| P12E0.2H3.0  |                  | 3.0                   |           |            | 13                 |
| P12E0.2H6.0  |                  | 6.0                   |           |            | 18                 |

**Table S2.** Textural properties of the PVDF aerogels prepared using ethanol as nucleation agent

| Sample  | $S_{\text{BET}}$<br>( $\text{m}^2 \text{g}^{-1}$ ) <sup>a</sup> | Pore<br>diameter<br>(nm) <sup>b</sup> | Pore volume<br>( $\text{cm}^3 \text{g}^{-1}$ ) <sup>c</sup> | $\rho_b$<br>( $\text{g cm}^{-3}$ ) <sup>d</sup> | $\rho_s$<br>( $\text{g cm}^{-3}$ ) <sup>e</sup> | Porosity<br>(%) |
|---------|-----------------------------------------------------------------|---------------------------------------|-------------------------------------------------------------|-------------------------------------------------|-------------------------------------------------|-----------------|
| P12E0.2 | 113                                                             | 19                                    | 0.54                                                        | 0.125                                           | 1.49                                            | 92              |
| P9E0.2  | 136                                                             | 23                                    | 0.80                                                        | 0.096                                           | 1.37                                            | 93              |
| P7E0.2  | 160                                                             | 21                                    | 0.86                                                        | 0.086                                           | 1.58                                            | 94              |
| P5E0.2  | 152                                                             | 22                                    | 0.85                                                        | 0.077                                           | 1.40                                            | 95              |

<sup>a</sup>Specific surface area obtained by N<sub>2</sub> sorption using the BET method

<sup>b</sup>Determined from the desorption curve using the BJH method

<sup>c</sup>Determined from the adsorption curve using the BJH method

<sup>d</sup>bulk density calculated by dimensions and weight

<sup>e</sup>skeletal density calculated using a He pycnometer

The relative content of the crystalline phases ( $F(\alpha + \beta + \gamma)$ ) in the PVDF aerogels was calculated using the following equation [1]:

$$F(\beta + \gamma) = \frac{A_{\beta,\gamma}}{\left(\frac{k_{\beta,\gamma}}{k_{\alpha}}\right)A_{\alpha} + A_{\beta+\gamma}} * 100\%$$

Where  $A_{\alpha}$  and  $A_{\beta}$  are the corrected baseline absorbance at 761  $\text{cm}^{-1}$  and 840  $\text{cm}^{-1}$ , respectively.  $k_{\alpha}$  is  $6.1 \times 10^4 \text{cm}^2 \text{mol}^{-1}$  and  $k_{\beta,\alpha}$  is  $7.7 \times 10^4 \text{cm}^2 \text{mol}^{-1}$  are the corresponding absorption coefficients.  $F(\beta)$  and  $F(\gamma)$  are calculated by using the intensity of the absorption peaks of 1275  $\text{cm}^{-1}$  and 1234  $\text{cm}^{-1}$  [2], for the  $\beta$ , and  $\gamma$  phases, respectively, according to the following equations:

$$F(\beta) = F(\beta + \gamma) * \frac{A_{1275}}{A_{1275} + A_{1234}} * 100\%$$

$$F(\gamma) = F(\beta + \gamma) * \frac{A_{1234}}{A_{1275} + A_{1234}} * 100\%$$

Finally, the relative content of  $\alpha$ -PVDF ( $F(\alpha)$ ) was calculated using  $F(\alpha) = 1 - F(\beta) - F(\gamma)$ .

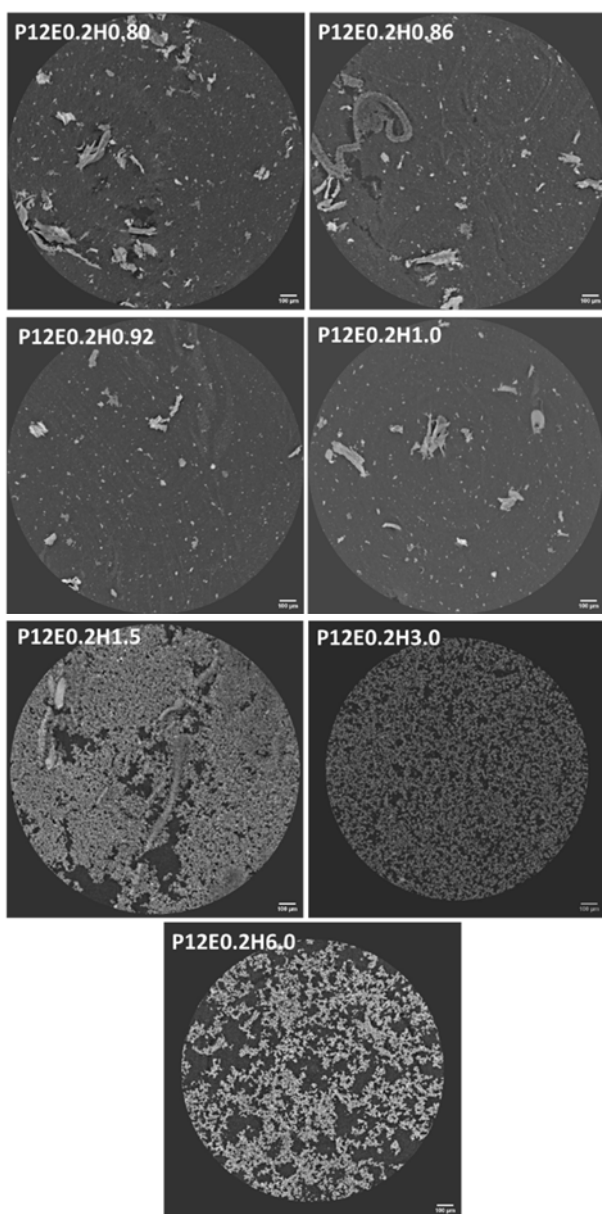

**Figure S1.** Axial maximum intensity projections (MIP) of the aerogels prepared with 12 wt.% PVDF,  $x_{EtOH} = 0.2$ , and variable PVDF/H<sub>2</sub>O ratio from 0.80 to 6.0.

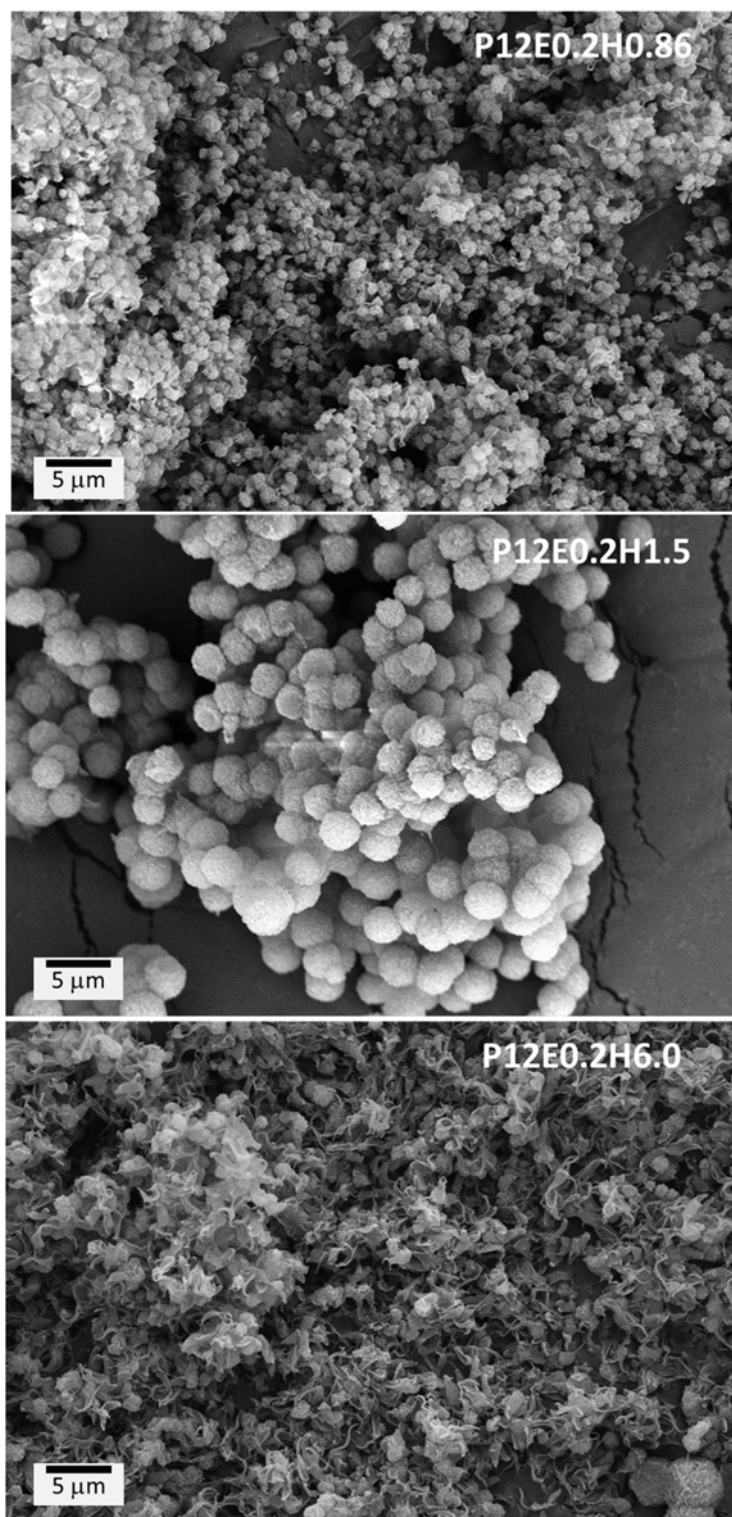

**Figure S2.** SEM micrographs displaying the morphological differences between the samples with variable phase composition. The P12E0.2 sample has a bimodal morphology of spherulites and leaf-like particles; the P12E0.2H1.5 aerogel has solely spherulites; the P12E0.2H6.0 has mostly leaf-like particles with small signs of tiny spherulites.

1. Zhou, H.; Wang, H.; Liu, Z.; Yang, H.; Yuan, C.; Wang, Y. Facilitated Phase Transformation of PVDF in Its Composite with an Ionic Liquid. *Polymer (Guildf)*. **2021**, 220, doi:10.1016/j.polymer.2021.123564.
2. Gregorio, Jr., R.; Cestari, M. Effect of Crystallization Temperature on the Crystalline Phase Content and Morphology of Poly(Vinylidene Fluoride). *J. Polym. Sci. Part B Polym. Phys.* **1994**, 32, 859–870, doi:10.1002/polb.1994.090320509.
